# Supplementary material
Source: PubMed Central journal article supplement (PMC4249513)
Supplement: AAC.03555-14_zac012143522so1.pdf [file AAC.03555-14_zac012143522so1.pdf]

Crystal structures of *Klebsiella pneumoniae* dihydrofolate reductase bound to propargyl-linked antifolates reveal features for potency and selectivity

Kristen M. Lamb, Michael N. Lombardo, Jeremy Alverson<sup>a</sup>, Nigel D. Priestley<sup>a</sup>, Dennis L. Wright and Amy C. Anderson\*

Department of Pharmaceutical Sciences, University of Connecticut, 69 N. Eagleville Rd., Storrs, CT 06269

<sup>a</sup>Department of Chemistry, University of Montana, Missoula, MT 59812

Contents:

Figure S1. Simulated annealing omit electron density

Figure S2. Loop residues 49-54 show displacement in the three models

Figure S3. Compound **4** bound to KpDHFR and human DHFR

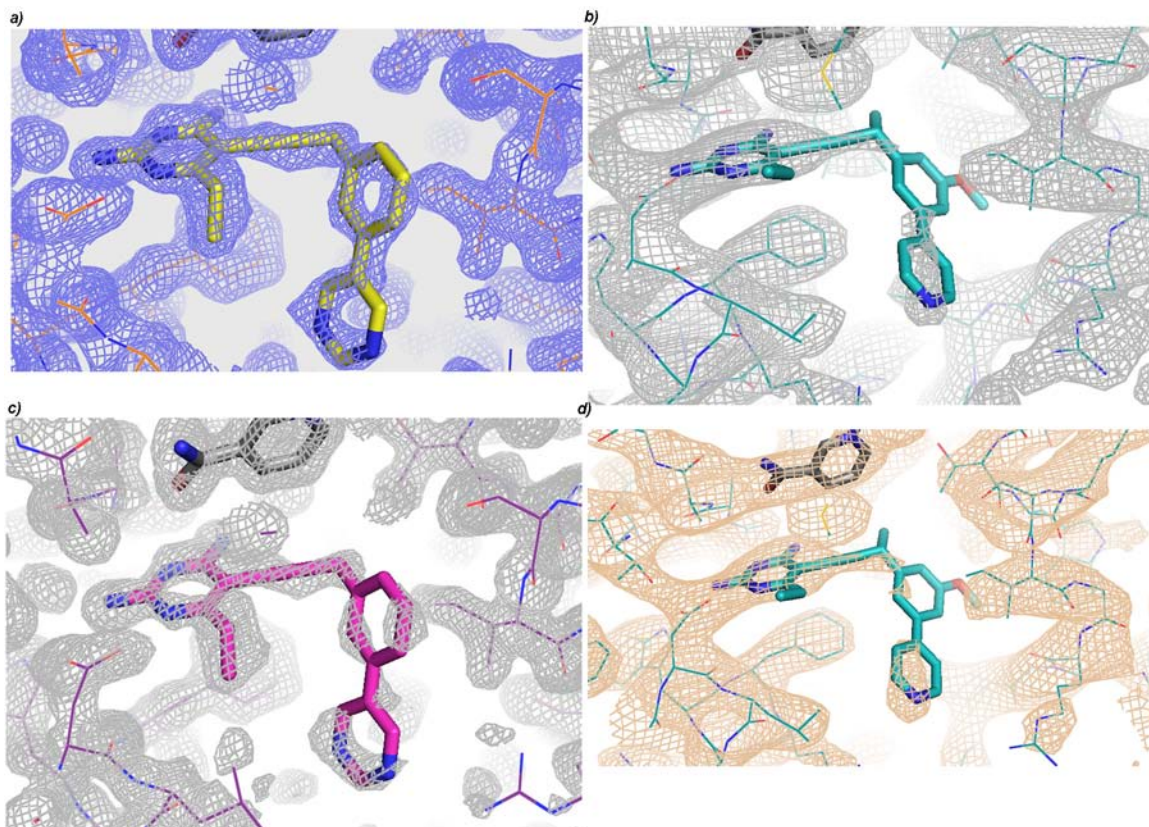

**Figure S1.** Simulated annealing omit electron density for a) compound **4** and b) compound **3**. The omit maps were produced with Phenix 1.8.2 using simulated annealing and the protein without the inhibitor present. Resulting  $F_o - F_c$  maps are shown with a contour level of  $1.5\sigma$ . Maps showing electron density for c) compound **4** and d) compound **3** immediately after molecular replacement and prior to the addition of the compound coordinates to the refinement.

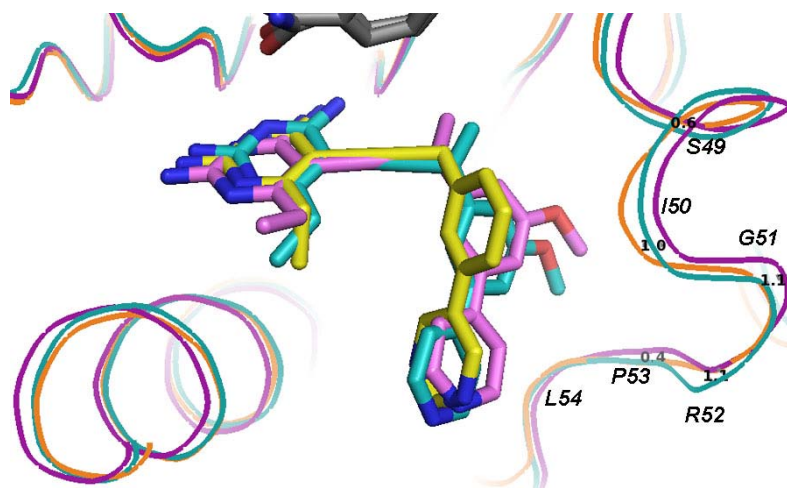

**Figure S2.** Residues 49-53 in the loop domain of KpDHFR reveal multiple conformations that show displacements of 1.1 Å. All three structures are shown with KpDHFR/NADPH/4 in yellow/orange, KpDHFR/NADPH/3 chain A in pink/purple and KpDHFR/NADPH/3 chain D in cyan.

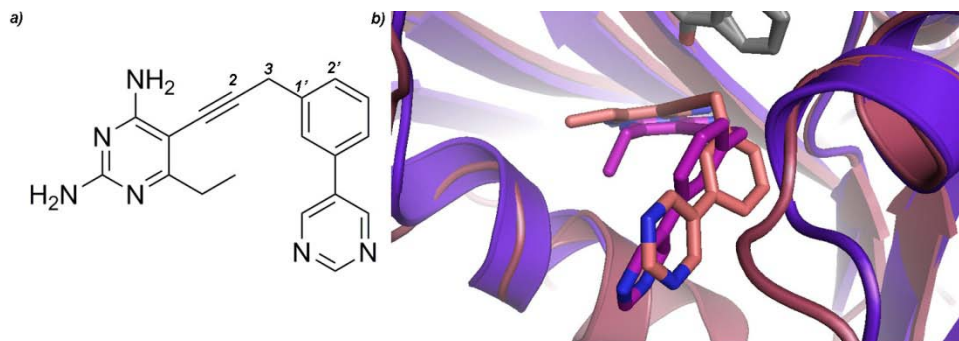

**Figure S3.** a) The dihedral angle defined by carbons 2/3 of the propargyl bridge and 1'/2' of the phenyl B-ring b) Compound **4** binds KpDHFR (purple) with a different conformation than human DHFR (salmon). The dihedral angle as bound to KpDHFR is  $-124.7^\circ$ ; the angle bound to human DHFR is  $81.0^\circ$ .
